---

**Is UAA or UGA part of the recognition signal for ribosomal initiation?**

---

J.F. Atkins

---

Howard Hughes Medical Institute at Department of Biology, University of Utah, Salt Lake City, UT 84112, USA

---

Received 7 July 1979

**ABSTRACT**

In none of the 92 published prokaryotic sequences is a translation codon preceded by UAG as the first "termination codon". In most cases the UAA or UGA is close to the initiation codon and may be part of the ribosome recognition signal.

Early work on translation initiation focused on an abortive attempt to find a protein nucleic acid interaction which would explain the initiation specificity observed (review 1). This situation was radically changed by the prediction of Shine and Dalgarno in 1974 (2) that an important feature of initiation is an interaction between the 3' end of the intermediate sized ribosomal RNA and a sequence preceding the initiation codon. Compelling evidence in favour of the proposal was obtained by the actual isolation of the mRNA-rRNA complex (3). The ultimate proof that this proposal was correct for one prokaryotic initiation has been provided by the recent isolation of mutants affecting the interaction (4). However this is clearly not the whole story as many regions which have the potential for mRNA-rRNA interaction and are followed at the appropriate distance by an AUG or GUG codon are non-functional in initiation. Many functional initiation codons are preceded by a sequence which does not have extensive complementarity with the 3' end of ribosomal RNA. Another feature of initiation sequences which may affect the Shine Dalgarno interaction is the potential for many of them to form stem and loop structures (recently reviewed in 49). However the role of these potential loops in initiation is unclear. Extensive studies with fusions between the *lac* initiation region and the  $\lambda$  cI or  $\lambda$  cro initiation region have so far not revealed the additional features which are important for initiation (52,53).

A re-examination of the sequences surrounding initiation codons reveals a striking fact not previously commented upon. None of the 63 published se-

quences from unrelated prokaryotes have UAG as the first translation terminator upstream of an initiation codon (table 1) and if related sequences are considered the total is 92. Some of these related sequences are similar and some are very different. On a random basis the expected frequency of UAG is 21 and 31 respectively. Several reports have noted that there was a terminator just upstream of the initiation codon, but the extent of this feature has not been appreciated. If the sequence was random then on average one would expect to find one terminator in any frame per seven codons. However examination of the published sequences (table 1) shows that half of the sequences have UAA or UGA within the first three codons, and nearly all of the rest have either within the first seven codons. This puts the majority of the terminator codons between the Shine Dalgarno region and the initiation codon, although some of them are part of that region, and some of them 5' to it. If there is functional significance in the UAA or UGA preceding the initiation codon, then their distance from the initiation codon might be expected to be more constant. However the distance from the initiation to the Shine Dalgarno region is also variable though less so.

It appears not to be important which of the two, UAA or UGA occurs. The UAA or UGA codon occurs in any of the three frames with respect to the initiation codon, but perhaps there is a preponderance in the zero or +1 frame. There is no apparent distinction between UAG, UAA and UGA either upstream of the first "terminator" or downstream of the initiator, or corollary with the gene termination codon. In table 1 there are 11 UAG, 18 UAA and 10 UGA triplets upstream of the "terminator" preceding the initiator, and 5 UAG, 19 UAA and 8 UGA triplets downstream of the initiator. In some cases one or two bases in the initiation codon itself form part of a "termination codon". Such terminators are noted in the table and are never UAG. In these cases the next upstream terminator is still nearby and is UAA or UGA. Not quite all the initiators are preceded by a termination codon, but each of the exceptions may be interesting. The translation initiation codon for  $\phi$ x174 gene A is very close to a transcription initiation site, and the resulting transcript is unstable (5.6). The proximity of fd gene III to the translation start site has not been published, but there may be at least some similarities with  $\phi$ x174 gene A (7). The  $\lambda$  repressor (cI) protein can be synthesized from either of two mRNAs originating at different promoters (8). One message contains the sequences preceding the initiation codon shown in table 1, whereas the other begins at the translation initiation codon directly. The 10 to 20 fold lower level of protein synthesis in the latter case has been presumed to be due to

the lack of mRNA-rRNA base pairing, but it could equally well be due to the absence of a UAA or UGA preceding the initiation codon. Miller and colleagues (review 1) have studied translational re-starts in the lacI gene. In these cases also UAA or UGA is found as the closest upstream stop codon, however the distances are considerable. Perhaps significantly the level of translation initiation is low.

A considerable number of the known sequences are from polycistronic RNAs but it is very unlikely that the upstream termination codons are merely a fail safe mechanism for termination of the preceding gene. In MS2 for instance, the maturation gene is the 5' proximal gene, and it has a termination codon as the second upstream codon from the initiation codon (9). The maturation gene is in a different reading frame (10) than the next downstream gene, the coat gene. Nevertheless the UGA which is the second upstream codon from the coat initiator is in phase with the coat gene and not the maturation gene. The coat and synthetase genes are in the same reading frame but there is a double stop codon at the end of the coat gene (11), and no in-phase read-through of these codons to the UGA which precedes the synthetase gene has ever been detected despite a detailed study (Atkins, Gesteland, and Reid, unpublished).

This examination of "terminator codons" preceding translation initiation sites was prompted by (1) my studies with J. Steitz and C. Anderson on the effects on protein synthesis of using antibody to release factors (unpublished), (2) the isolation by Ganoza and colleagues (review 12) of a protein which seems to be involved in initiation as well as termination, and (3) the isolation of a mutant, which is not in the structural gene for this protein (12), but which gives suppression of UAA and UGA and not UAG (41). The observations reported here lend support to the general idea suggested by Ganoza and colleagues that termination signals are involved in ribosome recognition (45). However analysis of the sequences specifically limit the signals to UAA and UGA, and make it clear that these signals are in positions where they could be as important as the "Shine Dalgarno interaction" in ribosome recognition. Perhaps then translation initiation involves not only interaction between 16s rRNA and the "Shine Dalgarno sequences", but also the nearby UAA or UGA. From the work of Ganoza it seems likely that a protein is involved in recognition and thus may be part of the initiation complex. However this protein has to be specific for UGA or UAA. Involvement of rRNA (2) in addition to the protein release factors (42,43) in chain termination has been considered, but the situation is still unclear (13).

TABLE 1

| Gene                                      | Sequence 5' of initiation codon | Gene initiation codon               | Gene stop codon             |     |
|-------------------------------------------|---------------------------------|-------------------------------------|-----------------------------|-----|
| M52 maturation <sup>9,10</sup>            | UUC CAU UCC UAG GAG GUU UGA     | CCU GUG CGA GCU UUU AGU             | UAG                         |     |
| M52 coat <sup>11</sup>                    | GAG CCC UCA ACC GGA GUU UGA     | AGC AUG GCU UCC AAC UUU             | UAA                         |     |
| M52 lysis <sup>11,16,17</sup>             | AGG CAA UGC AAG GUC UCC UAA     | AAG AUG GAA ACC CGA UUC             | UAA                         |     |
| M52 synthetase <sup>11,31,32</sup>        | GCC AUU CAA ACA UGA GGA UUA     | CCC AUG UCG AAG ACA ACA             | UAG                         |     |
| Q8 maturation <sup>1</sup>                | CUG AGU AUA UGA CGA CAU         | AUG CCU AAA UUA CCG                 |                             |     |
| Q8 coat <sup>1</sup>                      | AAA CUU UGG GUC AAU CUG UGC     | AUG GCA AAA UUA GAG                 | UGA                         |     |
| Q8 synthetase <sup>32,1</sup>             | UAA CUA AGG AUG AAA UCC         | AUG UCU AAG ACA G                   | UAA                         |     |
| φx174 A <sup>4</sup>                      | A AAU CUU GGA GCC UUU UUU       | AUG GUR CGU UCU UAU                 | UGA                         |     |
| φx174 A <sup>7</sup>                      | U GAG UGU UCA AGA UUG CUG GAG   | GCC UCC ACU AUG AAA UCG             | AGA                         |     |
| φx174 B <sup>6</sup>                      | UGC UAA AGG UCU AGG AGC UAA     | AGA AUG GAA CAA CUC ACU             | UGA                         |     |
| φx174 C <sup>6</sup>                      | UAA AUC GAA GUG GAC UGC UGG     | CGG AAA AUG AGA AAA UUC GAC         | UGA                         |     |
| φx174 D <sup>6</sup>                      | UGU UCA ACC ACU AAU AGU UAA     | GAA AUC AUG AGU CAA GUU ACU         | UAA                         |     |
| φx174 E <sup>6</sup>                      | CUC GUC GCU GCG URG AGG         | CUU GCG UUU AUG GUA CCG UGG ACU     | UGA                         |     |
| φx174 F <sup>6</sup>                      | CUU CGG CCC CUU ACU UGA GGA     | UUA AUU AUG UCU AAU AUU CAA         | UGA                         |     |
| φx174 G <sup>6</sup>                      | GUA GGU UUU CUG CUU AGG AGU     | UUA AUC AUG UUU CAG ACU UUU         | UGA                         |     |
| φx174 H <sup>6</sup>                      | UCU CCA GCC ACU UAA GUG AGG     | UGA UUU AUG UUU GGU GCU AUU         | UAA                         |     |
| φx174 J <sup>6</sup>                      | AAA AUU ACG UGC GGA AGG AGU     | GAU GUA AUG UCU AAA GGU AAA         | UAA                         |     |
| φx174 K <sup>6</sup>                      | AGA AGU UAA CAC UUU CCG         | Alu UUU CUG AUG AGU CGA AAA AUU UGA | UAA                         |     |
| fd I <sup>7</sup>                         | UUC UUA UUU GGA UUG GGA UAA     | AUA AAU AUG GCU GUU UAU UUU         | UAA                         |     |
| fd II <sup>7</sup>                        | CUU UUC UGA UUA UCA ACC GGG     | GUA CAU AUG AUU GAC AUG CAU         | UAA                         |     |
| fd III <sup>7</sup>                       | UUG GAG AUU UUC AAC GUG         | AAA AAA UUA UUA UAA                 | UAA                         |     |
| fd IV <sup>7</sup>                        | CUG UUU CAA UUA AAA AAG GUA     | AUU CAA AUG AAA UUG UUA AAU         | UAG                         |     |
| fd V <sup>7</sup>                         | UCU UAA AAU CGC AUA AGG UAA     | UUC AAA AUG AUU AAA GUU GAA         | UAA                         |     |
| fd VI <sup>7</sup>                        | CAU ACU CGG UAA UAA GGA GUC     | UUA AUC AUG CCA GUU CUU UUG         | UAA                         |     |
| fd VII <sup>7</sup>                       | GUC UGC GCC UCG UUC CCG CUA     | AGU AAC AUG GAG CAG GUC GCG         | 'GA                         |     |
| fd VIII <sup>7</sup>                      | UUU UAC CCG UUU AAU GGA AAC     | UUC CUC AUG AAA AAG UCU UUA         | UGA                         |     |
| fd IX <sup>7</sup>                        | GCU UGG UAU AAU CGC UGG GGG     | UCA AAG AUG AGU GUU UUA GUG         | UGA                         |     |
| fd X <sup>7</sup>                         | CUG UUU AAA GCA UUU GAG GGG     | GAA UCA AUG AAU AAU UAU GAC         | UAA                         |     |
| T7 0.3 site a <sup>1</sup>                | AAC UGC ACG AGG UAA             | CAC AAG AUG GCU AUG UCU AAC         |                             |     |
| T7 0.3 site b <sup>1</sup>                | GUA CGA GGA GGA UGA             | AGA AUG UAC U                       |                             |     |
| T7 1.0 polymerase b                       | UUU ACU AAC UGG AAG AGG CAC     | UAA AUG AAC ACG AUU AAC             |                             |     |
| T7 1.5 ligase <sup>c</sup>                | UUU AAC CAA UAG GAG AUA AAC     | AUU AUG AUG AAC AUU AAC             |                             |     |
| T4 rII B <sup>1</sup>                     | C CUA AUA AGG AAA AUU AUG       | AAC UAC AAU                         |                             |     |
| E.c. thr leader <sup>22</sup>             | AUA AAA AUU ACA GAG UAC ACA     | ACA UCC AUG AAA CGC AUU AGC         | UGA                         |     |
| E.c. thr A gene <sup>22</sup>             | UUU UCG ACC AAA GGU AAC         | GAG GUA ACC AUG CGA GUG URG AAG     |                             |     |
| S.t. his leader <sup>24</sup>             | UCA AAU GAA UAA GCA UUC         | AUC GGA AUU AUG ACA CGC GUU CAA     | UAG                         |     |
| S.t. his G <sup>24,d</sup>                | CGG UUC GAA CAG GAU AAA GAG     | GAA CCG AGA UUG UUA GAC AAC AAC     | UGA                         |     |
| S.t. his β <sup>1</sup>                   | AAG GCG GAA CCC UCU GAU         | GGA GUA AAG ACC AUG AGC UUC AAU ACC | UGA                         |     |
| S.t. his C <sup>d</sup>                   | CGU AAA CGC CCU CAA GGA         | GCA AGC AUG AGC ACU GAA AAG         | UGA                         |     |
| E.c. phe leader <sup>33</sup>             | AAG UCA CUU AAG GAA ACA AAC     | AUG AAA CAC AUA CCG                 | UGA                         |     |
| E.c. phe A <sup>33</sup>                  | CUU UUU UAU UGA UAA CAA         | AAA GGC AAC ACU AUG ACA UCG         | GAA AAC                     |     |
| E.c. trp leader <sup>34</sup>             | CAC GUA AAA AGG GUA UCC         | ACA AUG AAA GCA AUU UUC             |                             |     |
| E.c. trp E <sup>34</sup>                  | UUU UUU GAA CAA AAU UAG         | AGA AUA ACA AUG CAA AGA CAA AAA     |                             |     |
| E.c. trp A <sup>35,1,0</sup>              | UUU GAA AGC ACG AGG GGA         | AAU CUG AUG GAA CCG UAC GAA         | UAA                         |     |
| S.t. trp B <sup>35</sup>                  | ACA CUG CGC GCA UAU UAA         | GGA AAA AAC AUG ACA ACA CUU CUC     |                             |     |
| E.c. trp C <sup>35</sup>                  | CUG CGC GCA CGA GGG UAA         | AUG AUG CAA ACC GUU UUA             |                             |     |
| E.c. ara B <sup>1</sup>                   | UUU UUU GGA UGG AGU GAA         | ACG AUG CGC AUU GCA AUU             |                             |     |
| E.c. gal E <sup>1</sup>                   | AUA AGC CUA AUG GAG CGA         | AUU AUG AGA GUU CUG GUU             |                             |     |
| E.c. gal T <sup>1</sup>                   | UAU CCG GAU UAA GGA ACG         | ACC AUG CCG CAA UUU AAU             |                             |     |
| E.c. lac I <sup>36</sup>                  | AGU CAA UUC AGG GUG CUG         | AAU GUC AAA CCA GUA ACG             | UGA                         |     |
| E.c. lac Z <sup>36</sup>                  | GAU AAC AAU UUC ACA CAG         | GAA ACA GCU AUG ACC AUG AUU ACG     |                             |     |
| β-lactamase <sup>36</sup>                 | CAA UAA UAU UGA AAA             | AGG AAG AGU AUG AGU AUU CAA CAU     | UAA                         |     |
| E.c. ribosomal L14 <sup>27</sup>          | UUG ACA UUA CGG GAG CCU         | AAA AUG AUC CAA GAA CAG             |                             |     |
| E.c. ribosomal S12 <sup>27</sup>          | CCU AAA ACC AGG AGC AAU         | UUA AUG GCA ACA GUU AAC             |                             |     |
| E.c. ribosomal L12 <sup>28</sup>          | AUU ACC CAA CUU GAG             | GAA UUU AUA AUG GCU AAG AAA GUA     | UAA                         |     |
| E.c. ribosomal L1 <sup>28</sup>           | GGC CUG GUA GUG GAG GAC         | UUA GAA AUG GCU AAA CUG ACC         | UAA                         |     |
| E.c. ribosomal L10 <sup>28</sup>          | GGC AAA CAU CCA CGA GCA         | AAG CUA AUG GCU UUA AAU CUU         | UAA                         |     |
| E.c. ribosomal L7/L12 <sup>28</sup>       | UUC UGA UAU UCA GGA             | ACA AUU UAA AUG UCU AUC ACU AAA     | UAA                         |     |
| E.c. RNA polymerase subunit <sup>37</sup> | CUU GUC AGC GAG CUG AGG         | AAC UCU AUG GUU UAC UCC UAU         |                             |     |
| E.c. lipoprotein <sup>30,31</sup>         | UCA AUC UAG AGG GUA UUA         | AUA AUG AAA GCU ACU AUA             | UAA                         |     |
| λ cro <sup>19,20</sup>                    | GGU UGC AUG UAC UAA             | GGA GGU UGU AUG GAA CAA CGC AAA     | UAA                         |     |
| λ o <sup>10</sup>                         | CUG AGG UCA UUA                 | CUG GAU CUA UCA ACA GGA             | GUC AUU AUG ACA AAU ACA GCA | UAG |
| λ cI <sup>9,29</sup>                      | UAU CCC URG CCG UGA             | UAG AUU UAA CCG AUG ACA AAA AAG     | UGA                         |     |
| λ cII <sup>20,18</sup>                    | UGU UAU CUA AGG                 | AAA UAC UUA CAU AUG GUU CGU GCA AAC | UGA                         |     |
| λ cII (non functional) <sup>18</sup>      | GG CCA GUC UAG                  | AAA UAC UUA CAU AUG GUU CGU GCA AAC |                             |     |

IS2

Downloaded from https://academic.oup.com/nar/article/7/4/1035/1094248 by guest on 23 April 2024

Why is UAG excluded from being part of the "start signal"? The effect of a UAG should be tested by conversion of the "start signal" UAA or UGA by site directed mutagenesis (14). However a mutant of  $\lambda$  with an IS2 insertion just preceding the cII gene may be instructive in this regard. The insertion interferes with the expression of cII and it causes UAG to be the first terminator upstream of the cII AUG initiation codon (15). In this mutant 4 of the 7 bases in the Shine Dalgarno sequence and all of the bases between the Shine Dalgarno sequence and the initiator AUG remain intact. However since 3 of the 7 bases in the Shine Dalgarno sequence are altered a clear conclusion cannot be drawn from this mutant.

Examination of the known sequences surrounding higher eukaryotic translation initiation sites reveal several differences. UAG is frequently found as the closest "terminator" upstream of the start codon, e.g., in SV40 T and t (16), SV40 VP<sub>2</sub> (16), human  $\beta$  globin (17) and turnip yellow mosaic virus coat gene (18). Also the nearest "terminator" codon is frequently much further removed from the initiation codon than in prokaryotes. When more eukaryotic initiation sites are sequenced it will be possible to examine the situation in more detail. However numerous other studies (review 1, 19) also show differences between prokaryotic and eukaryotic initiation. In prokaryotes where there are polycistronic mRNAs the ribosomes may have evolved to recognize an intimate association between termination and initiation (48). Thus the use of a "termination" codon as part of a ribosome recognition signal even when it is unrelated in function to translation termination may not be too surprising.

Sequences surrounding initiation codons. The initiation codon is in italics. The closest upstream "terminator codon" is underlined twice. With  $\phi$ x174 gene K, T7 0.3 site b, trp A and the gene for ribosomal protein S12 the closest "terminator codon" (which is UAA or UGA) overlaps the initiation codon but it is underlined by a dotted line. All other terminator codons are also underlined by dotted line. Reference 1 is a review and is not the original source of these references, <sup>a</sup> is G. E. Christie and T. Platt (review 50), <sup>b</sup> is D. McConnell (DNA sequence) and J. Dunn (RNA sequence) unpublished, <sup>c</sup> is J. Dunn, unpublished, <sup>d</sup> is Husson and Barnes, unpublished (DNA sequence) and Kohno, T, unpublished (protein sequence), <sup>e</sup> is Wu and Platt (review 39). The related sequences also examined were from R17 and f2 (review 1), G4 (28) and M13 (P. Van Wezenbeek, T. Hulsegos and J. G. G. Schoenmakers, unpublished results), Salmonella tryptophan operon (40), and the E. coli histidine operon (23). E.c. signifies E. coli and S.t. Salmonella typhimurium.

## ACKNOWLEDGMENTS

I thank Ray Gesteland for characteristically helpful suggestions and Joan Steitz and Clelia Ganoza for prior discussions of translation initiation.

## REFERENCES

1. Steitz, J. A. (1979) in *Biological Regulation and Development*, Vol. 1, Goldberger, R. F., Ed., pp. 349-399 Plenum Press, New York.
2. Shine, J. and Dalgarno, L. (1974) *Proc. Nat. Acad. Sci. USA* 71, 1342-1346
3. Steitz, J. A. and Jakes, K. (1975) *Proc. Nat. Acad. Sci. USA* 72, 4734-4738
4. Dunn, J. J., Buzash-Pollert, E. and Studier, F. W. (1978) *Proc. Nat. Acad. Sci. USA* 75, 2741-2745
5. Fujimura, F. K. and Hayashi, M. (1978) in *The Single-Stranded DNA Phages*, Denhardt, D. T., Dressler, D. and Ray, D. S, Eds., Cold Spring Harbor Laboratory, New York.
6. Sanger, F., Coulson, A. R., Freidmann, R., Air, G. M., Barrell, B.G., Brown, N. L., Fiddes, J. C., Hutchinson III, C. A., Slocombe, P.M., and Smith, M. (1978) *J. Mol. Biol.* 125, 225-246
7. Schaller, H., Beck, E. and Takanami, M (1978) in the *Single-Stranded DNA Phages*, Denhardt, D. T., Dressler, D. and Ray, D. S., Eds., Cold Spring Harbor Laboratory, New York
8. Ptashne, M., Backman, K., Humayun, M. Z., Jeffrey, A., Maurer, R., Meyer, B. and Sauer, T. (1976) *Science* 194, 156-161
9. de Wachter, R., Vandenberghe, A., Merregaert, J., Contreras, R., and Fiers, W. (1971) *Proc. Nat. Acad. Sci. USA* 68, 585-589
10. Contreras, R., Ysebaert, M., Min Jou, W. and Fiers, W. (1973) *Nature New Biol.* 241, 99-101
11. Min Jou, W., Haegeman, G., Ysebaert, M. and Fiers, W. (1972) *Nature* 237, 82-88.
12. Ganoza, M.C. (1977) *Can. J. Biochem* 55, 267-281
13. Caskey, C. T., Bosch, L., Konecki, D. S. (1977) *J. Biol. Chem.* 252, 4435-4437.
14. Taniguchi, T. and Weissmann, C. (1978) *J. Mol. Biol.* 118, 533-565
15. Rosenberg, M., Court, D., Shimatake, H., Brady, C. and Wulff, D. L. (1978) *Nature* 272, 414-423.
16. Fiers, W., Contreras, R., Haegeman, G., Rogiers, R., Van de Voorde, A., Van Heuverswyn, H., Van Herreweghe, J., Volckaert, G., and Ysebaert, M. (1978) *Nature* 273, 113-120
17. Baralle, F. E. (1977) *Cell* 12, 1985-1995
18. Guilley, J. and Briand, J. P. (1978) *Cell* 15, 113-122
19. Kozak, M. (1978) *Cell* 15, 1109-1123
20. Schwarz, E., Scherer, G., Hobom, G. and Kössel, H. (1978) *Nature* 272, 410-414
21. Belin, D., Hedgpeth, J., Selzer, G. B. and Epstein, P. H. (1979) *Proc. Nat. Acad. Sci. USA* 76, 700-704
22. Gardner, J. (1979) *Proc. Nat. Acad. Sci. USA* 76, 1706-1710
23. Di Nocera, P. P., Blasi, F., Di Lauro, R., Frunzio, R., and Bruni, C. B. (1978) *Proc. Nat. Acad. Sci. USA* 75, 4276-4280
24. Barnes, W. M. (1978) *Proc. Nat. Acad. Sci. USA* 75, 4281-4285
25. Zurawski, G., Brown, K., Killingly, D. and Yanofsky, C. (1978) *Proc. Nat. Acad. Sci. USA* 75, 4271-4275
26. Sutcliffe, J. G. (1978) *Proc. Nat. Acad. Sci. USA* 75, 3737-3741

27. Post, L. E., Arfsten, A. E., Reusser, F. and Nomura, M. (1978) *Cell* 15, 215-229
28. Godson, G. M., Barrell, B. G., Staden, R. and Fiddes, J. C. (1978) *Nature* 276, 236-247
29. Humayun, A. (1977) *Nucleic Acid Res.* 4, 2137-2343
30. Scherer, G. (1978) *Nucleic Acid Res.* 5, 3141-3155
31. Vandenberghe, A., Min Jou, W. and Fiers, W. (1975) *Proc. Nat. Acad. Sci. USA* 72, 2559-2562
32. Atkins, J. F. and Gesteland, R. F. (1975) *Mol. Gen. Genet.* 139, 19-31
33. Zurawski, G., Brown, K., Killingly, D. and Yanofsky, C. (1978). *Proc. Nat. Acad. Sci. USA* 75, 4271-2475
34. Bertrand, K., Korn, L., Lee, F., Platt, T., Squires, C. L., Squires, C. and Yanofsky, C. (1975) *Science* 189, 22-26
35. Platt, T. and Yanofsky, C. (1975) *Proc. Nat. Acad. Sci. USA* 72, 2399-2403
36. Dickson, R. C., Abelson, J., Barnes, W. M., and Reznikoff, W. S. (1975) *Science* 187, 27-35
37. Gesteland, R. F., Wolfner, M., Grisafi, P., Fink, G., Botstein, D. and Roth, J. R. (1976) *Cell* 7, 381-390
38. Weiner, A. M. and Weber, K. (1973) *J. Mol. Biol.* 80, 837-855
39. Steege, D. A. and Söll, D. (1979) in *Biological Regulation and Development*, Vol. 1, Goldberger, R. F., Ed., Plenum Press, New York, pp. 433-485
40. Lee, F., Bertrand, K., Bennett, G. and Yanofsky, C. (1978) *J. Mol. Biol.* 121, 193-217
41. Phillips, S. L., Schlessinger, D. and Apirion, D. (1969) *Cold Spring Harb. Symp. quant. Biol.* 34, 499-503
42. Caskey, T., Scolnick, E., Tompkins, R., Goldstein, J., and Milman, G. (1969) *Cold Spring Harb. Symp. quant. Biol.* 34, 479-491
43. Capecchi, M. R. and Klein, H. A. (1969) *Cold Spring Harb. Symp. quant. Biol.* 34, 469-477
44. Post, L. E., Strycharz, G. D., Nomura, M., Lewis, H. and Dennis, P.P. (1979) *Proc. Nat. Acad. Sci. USA* 76, 1697-1701
45. Ganoza, M.C., Fraser, A. R., and Neilson, T. (1978) *Biochem.* 17, 2769-2775
46. Atkins, J. F., Steitz, J. A., Anderson, C. W., and Model, P. (1979) *Cell*, in press
47. Beremand, M. and Blumenthal, T. (1979) *Cell*, in press
48. Platt, T. (1978) in *The Operon*, Miller, J. H. and Reznikoff, W. S., Eds., pp. 263-302, Cold Spring Harbor Laboratory, New York
49. Selker, E. and Yanofsky, C. (1979) *J. Mol. Biol.* 130, 135-143
50. Pirtle, R. M., Pirtle, I. L. and Inouye, M. (1978) *Proc. Nat. Acad. Sci. USA* 75, 2190-2194
51. Pirtle, R. M., Pirtle, I. L. and Inouye, M. (1978) *Fed. Proc.* 38, 499-499
52. Roberts, T. M., Kacich, R. and Ptashne, M. (1979) *Proc. Nat. Acad. Sci. USA* 76, 760-674
53. Backman, K. and Ptashne, M. (1978) *Cell* 13, 65-71
